# Supplementary material
Source: publisher figshare collection journal article supplement (https://tandf.figshare.com/articles/dataset/_/5160715)
Supplement: Supplementary file 1 [file 2]

# Supplementary Materials to “Real-time High-Dimensional Monitoring and Diagnostics via Spatio-Temporal Smooth Sparse Decomposition”

Hao Yan, Kamran Paynabar, Jianjun Shi

May 4, 2017

**Appendix: Simulation study for static functional mean** We simulated the static functional mean as the simulated heat transfer map at time  $t = 200$  (shown in Figure 2 (c) in the paper). We added the clustered anomalies (shown in Figure 2 (d) in the original paper) after time  $t = 200$ . The ARLs of different algorithms over 5000 simulation replications for different change magnitude  $\delta = 0, 0.5, \dots, 2.5$  are given in Figure ?? . As we can see that the proposed method (RK) still performs the best due to its ability to accurately estimate the smooth functional mean and sparse clustered background.

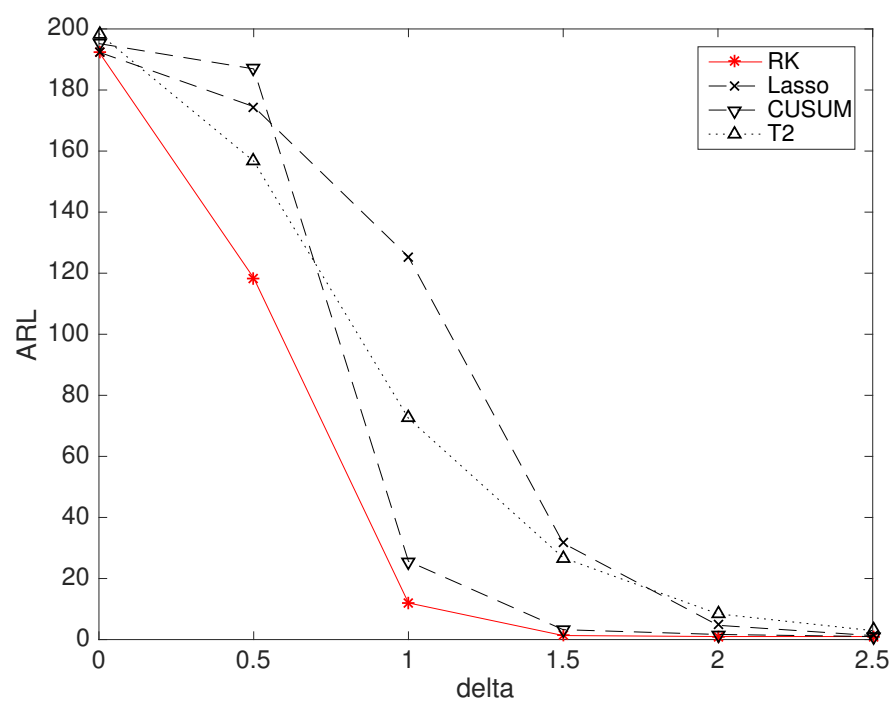

Figure 1: ARL in the static background
